# Supplementary material
Source: Frontiers journal article supplement (https://www.frontiersin.org/articles/449938)
Supplement: Data_Sheet_1.pdf [file Data_Sheet_1.pdf]

## Supplementary Material

**TABLE S1** Oligonucleotides used in this work. Restriction sites are in bold.

| Name                        | Sequence 5'-3'                              | Restriction sites   | Application/amplified fragment |
|-----------------------------|---------------------------------------------|---------------------|--------------------------------|
| bacterial one-hybrid system |                                             |                     |                                |
| B1                          | CAGGTACCGCGGCCGCGATGCGCGC<br>CGTCGCCGCGGGAC | KpnI, NotI          | hypR (SCO6294) gene            |
| B2                          | ATGGATCCTAGGTCAGTCCTCGGCG<br>TTCGTCCTG      | BamHI, AvrII        |                                |
| B3                          | ATAAACTGCCAGGCATCAAATTAA                    |                     | sequencing                     |
| B4                          | CGCTCGGTCGACACAACATACGA                     |                     | sequencing                     |
| hypR (SCO6294) deletion     |                                             |                     |                                |
| D1                          | CTGCAGTGAAGTACGATGCGTTTCG                   | PstI                |                                |
| D2                          | GGATCCGACTGAGCCGAAGAGCAC                    | BamHI               |                                |
| D3                          | GGATCCACGCAGGTCACCGGCGAT                    | BamHI               |                                |
| D4                          | GAATTCGATCAAGCAGCAACTCGGT                   | EcoRI               |                                |
| D5                          | GGATCCACCAGCCAATGACCTCCC                    | BamHI               |                                |
| D6                          | ATCAAGCTCGGCCAGGAG                          |                     | hypR deletion confirmation     |
| D7                          | AAGGTCACCGCCTCGAAG                          |                     | hypR deletion confirmation     |
| D8                          | CTCCCGCCGTCATCAAGT                          |                     | hypR deletion confirmation     |
| SCO6293 deletion            |                                             |                     |                                |
| D9                          | AAAAAGCTTCGCCTACGACCGTCAA<br>CT             | HindIII             |                                |
| D10                         | AAAGCGGCCGCTCGAACATCGTG                     | NotI                |                                |
| D11                         | AAAGCGGCCGCTTTCACCCTCTGAG<br>CAC            | NotI                |                                |
| D12                         | AAAGGTACCGCCGGTAGATCTGGTT<br>G              | KpnI                |                                |
| D13                         | GTTCGACGGTCTGCTACCAC                        |                     | SCO6293 deletion confirmation  |
| D14                         | AAGTACCTCGAAGCCGATCA                        |                     | SCO6293 deletion confirmation  |
| hypR (SCO6294) gene cloning |                                             |                     |                                |
| G1                          | GGATCCCATATGCGCGCCGTCGCCG<br>CGGG           | BamHI, NdeI         | hypR (SCO6294) gene            |
| G2                          | GAGCTCAAGCTTCTAGATCAGTCCT<br>CGGCGTTCGTCC   | SacI, HindIII, XbaI |                                |
| fragments for EMSA assay    |                                             |                     |                                |
| P1                          | TGTAGCGGATGCCGATGTT                         |                     | p6294/p6295                    |
| P2                          | CAGCCAATGACCTCCCACTA                        |                     |                                |
| P3                          | TTCCACGAGGCCGCGATG                          |                     | p6294                          |
| P4                          | CATCCGTGCTCCTGCGTCCT                        |                     |                                |
| p5911-12_F                  | ACGGTCTCACTCCTCGATG                         |                     | p5911/p5912                    |
| p5911-12_R                  | GACGGAAGACGAACGACCT                         |                     |                                |

|                                                  |                          |       |                                                                                                                                       |
|--------------------------------------------------|--------------------------|-------|---------------------------------------------------------------------------------------------------------------------------------------|
| p6289_F                                          | ACGACGACCTTCAGGGTCAC     |       | p6289                                                                                                                                 |
| p6289_R                                          | GTGAAGCGGGCGTTGTCT       |       |                                                                                                                                       |
| p3666_F                                          | CGTGCTGCCTACTTCAGACC     |       | p3666                                                                                                                                 |
| p3666_R                                          | AGGCCAACATCGAGGAGAC      |       |                                                                                                                                       |
| p2476_F                                          | GGTCCCTTTTCGCAGACTTT     |       | p2476                                                                                                                                 |
| p2476_R                                          | GCTGGGTGACCGGGACCA       |       |                                                                                                                                       |
| p5281_F                                          | CTCACGCGGCAGAACCTC       |       | p5281                                                                                                                                 |
| p5281_R                                          | GGAATCAAGGCTACGCCTAC     |       |                                                                                                                                       |
| p7176-77_F                                       | ATCGATCGAAGTCAGCCATC     |       | p7176/p7177                                                                                                                           |
| p7176-77_R                                       | ACACGGTGACGTGTGTCTG      |       |                                                                                                                                       |
| p7273_F                                          | GCAGGCGGGCTGAGTGAC       |       | p7273                                                                                                                                 |
| p7273_R                                          | GTGGGGGCCCCGGTAGGTG      |       |                                                                                                                                       |
| fragments for luciferase assay (promoter probes) |                          |       |                                                                                                                                       |
| P5                                               | GGATCCCACCGTCACACTCCCGGA | BamHI | p6294-old – fragment incorrectly indicated as a potential promoter region of <i>hypR</i> ( <i>SCO6294</i> ) gene due to misannotation |
| P6                                               | CATATGGGCCTCGTGGAAGGCCCG | NdeI  |                                                                                                                                       |
| P7                                               | GGATCCCCGCGATGCGCGCCGTCG | BamHI | p6294-probe – promoter region of <i>hypR</i> gene                                                                                     |
| P8                                               | CATATGTGCTCCTGCGTCCTGCGC | NdeI  |                                                                                                                                       |
| p5281_Bam                                        | GGATCCTGACGTAGGGTTCGAAGC | BamHI | p5281-probe                                                                                                                           |
| p5281_Nde                                        | CATATGGAGAACCGCCCTCCTTCC | NdeI  |                                                                                                                                       |
| p5315_Bam                                        | GGATCCTGTCGGCGCTGATGAAG  | BamHI | p5315-probe                                                                                                                           |
| p5315_Kpn                                        | GGTACCGATCTCGTTGTCGGTGTG | KpnI  |                                                                                                                                       |
| p5911-12_Nde_F                                   | CATATGGCTCGTCCTCGCAAGATC | NdeI  | p5911/p5912-probe                                                                                                                     |
| p5911-12_Nde_R                                   | CATATGGCCTCCCATGAGGGATCC | NdeI  |                                                                                                                                       |
| p6295_Bam_F                                      | GGATCCCATCCGTGCTCCTGCGTC | BamHI | p6295-probe                                                                                                                           |
| p6295_Nde_R                                      | CATATGCACACTCCCGGAGGTTCG | NdeI  |                                                                                                                                       |
| p6289_Bam_F                                      | GGATCCTGACGCGCCCGATCTCGA | BamHI | p6289-probe                                                                                                                           |
| p6289_Nde_R                                      | CATATGCTCCTCCTCCGTGCACG  | NdeI  |                                                                                                                                       |
| p7176-77_Nde_F                                   | CATATGGACCTCACCGACTAGATG | NdeI, | p7176/p7177-probe                                                                                                                     |
| p7176-77_Nde_R                                   | CATATGTCTCCCACCCTGACCCCA | NdeI, |                                                                                                                                       |
| p7273_Bam                                        | GGATCCATGGCGATCAGCCTCCA  | BamHI | p7273-probe                                                                                                                           |
| p7273_Kpn                                        | GGTACCGACCGTCACAGACACC   | KpnI  |                                                                                                                                       |
| other                                            |                          |       |                                                                                                                                       |
| P9                                               | GCTCTCGGGGAAGATCTCGAC    |       | control of cloning in pFLUXH                                                                                                          |
| P10                                              | IRDye-ATGCAGGCCTCTGCA    |       | amplification and IRD labeling of fragments cloned in pTZ57R                                                                          |
| P11                                              | IRDye-TCGGTACCTCGCGAA    |       |                                                                                                                                       |
| P12                                              | TAGCTACTGCGCCTCCACAAG    |       | SCO6281 promoter, non-specific competitor for EMSA                                                                                    |
| P13                                              | CGACGGCACCGTGTCTGATGA    |       |                                                                                                                                       |

**TABLE S2** Bacterial strains and plasmids used in this study

| Strain or plasmid                           | Relevant genotype or description                                                                                                                                                                                   | Source or reference                              |
|---------------------------------------------|--------------------------------------------------------------------------------------------------------------------------------------------------------------------------------------------------------------------|--------------------------------------------------|
| <b><i>Escherichia coli</i></b>              |                                                                                                                                                                                                                    |                                                  |
| DH5 $\alpha$                                | F <sup>-</sup> endA1 glnV44 thi-1 recA1 relA1 gyrA96 deoR nupG $\Phi$ 80dlacZ $\Delta$ M15 $\Delta$ (lacZYA-argF)U169, hsdR17(r <sub>K</sub> <sup>-</sup> m <sub>K</sub> <sup>+</sup> ), $\lambda$ <sup>-</sup>    | Promega                                          |
| BL21(DE3)                                   | F <sup>-</sup> , <i>ompT</i> , <i>hsdSB</i> (rB <sup>-</sup> , mB <sup>-</sup> ), <i>gal</i> , <i>dcm</i> (DE3)                                                                                                    | Promega                                          |
| BL21(DE3)pLysS                              | F <sup>-</sup> , <i>ompT</i> , <i>hsdSB</i> (rB <sup>-</sup> , mB <sup>-</sup> ), <i>gal</i> , <i>dcm</i> (DE3), pLysS (Cam <sup>R</sup> )                                                                         | Promega                                          |
| US0( $\Delta$ hisB $\Delta$ pyrF)           | selection strain for bacterial one-hybrid system with deletion in <i>hisB</i> and <i>pyrF</i> genes (homologues of yeast <i>HIS3</i> and <i>URA3</i> )                                                             | (Meng et al., 2006)                              |
| ET12567/pUZ8002                             | strain for conjugal transfer of DNA from <i>E. coli</i> to <i>Streptomyces</i> ( <i>dam dcm hsdS</i> Cam <sup>R</sup> Tet <sup>R</sup> on the bacterial chromosome; <i>tra</i> Kan <sup>R</sup> RP4 23 on pUZ8002) | (Kieser et al., 2000)                            |
| <b><i>Streptomyces coelicolor</i> A3(2)</b> |                                                                                                                                                                                                                    |                                                  |
| M145                                        | wild type strain, <i>S. coelicolor</i> A3(2) (SCP1 <sup>-</sup> SCP2 <sup>-</sup> )                                                                                                                                | (Kieser et al., 2000)                            |
| P130                                        | deletion of <i>hypR</i> ( <i>SCO6294</i> ) gene (replacement with hygromycin resistance cassette $\Omega$ hyg)                                                                                                     | this work                                        |
| P138                                        | deletion of <i>hypR</i> ( <i>SCO6294</i> ) gene (no resistance cassette)                                                                                                                                           | this work                                        |
| P201                                        | deletion of <i>SCO6293</i> gene                                                                                                                                                                                    | this work                                        |
| MG01                                        | negative control for luciferase assay, M145 with integrated pFLUXH without insert                                                                                                                                  | (Szafran et al., 2016)                           |
| strains for luciferase assay                | M145 and P138 with integrated pFLUXH derivatives for luciferase assays                                                                                                                                             | this work                                        |
| <b>Plasmids</b>                             |                                                                                                                                                                                                                    |                                                  |
| pGEM-T Easy                                 | T-vector for direct cloning of PCR products (Amp <sup>R</sup> )                                                                                                                                                    | Promega                                          |
| pTZ57R/T                                    | T-vector from InstT/A Cloning kit for direct cloning of PCR products (Amp <sup>R</sup> )                                                                                                                           | Fermentas (Thermo-Scientific)                    |
| pET28a(+)                                   | plasmid for expression of proteins with His-tag (T7 promoter, Kan <sup>R</sup> )                                                                                                                                   | Novagen                                          |
| pET28NStrep                                 | pET28a(+) vector modified by insertion of the sequence generating N-terminal Strep-tag between NcoI and BamHI sites                                                                                                | (Jaworski et al., 2018)                          |
| pH3U3-18random                              | the library of randomized 18-bp sequences upstream of reporter genes (the yeast <i>HIS3</i> and <i>URA3</i> ) in the pH3U3 plasmid (Kan <sup>R</sup> )                                                             | (Wolański et al., 2011)                          |
| pB1H1                                       | plasmid (Cam <sup>R</sup> ) for expression of proteins fused to $\alpha$ subunit of RNA polymerase                                                                                                                 | (Meng et al., 2005)                              |
| pB1H1-SCO6294                               | plasmid pB1H1 with <i>hypR</i> ( <i>SCO6294</i> ) gene cloned in NotI and BamHI sites providing fusion of HypR with $\alpha$ subunit of RNA polymerase                                                             | this work                                        |
| pOJ260                                      | vector for conjugal transfer from <i>E. coli</i> to <i>Streptomyces</i> , non-integrative, (Apra <sup>R</sup> ), does not propagate in <i>Streptomyces</i>                                                         | (Bierman et al., 1992)                           |
| pIJ2529-hyg                                 | pIJ2529 (Kieser et al., 2000) with hygromycin resistance cassette $\Omega$ hyg (Blondelet-Rouault et al., 1997) cloned in BamHI site                                                                               | gift from A. Butler, University of Leicester, UK |
| pJZ12                                       | pOJ260 with <i>upstream</i> flanking arm amplified using the primer pair D3 and D4 and cloned in BamHI and EcoRI sites                                                                                             | this work                                        |
| pJZ13                                       | pJZ12 with <i>downstream</i> flanking arm amplified using the primer pair D1 and D2 and cloned into BamHI and PstI sites                                                                                           | this work                                        |

|                    |                                                                                                                                                                                                                              |                                                                         |
|--------------------|------------------------------------------------------------------------------------------------------------------------------------------------------------------------------------------------------------------------------|-------------------------------------------------------------------------|
| pJZ14              | pJZ13 containing hygromycin resistance cassette $\Omega_{hyg}$ obtained as BamHI restriction fragment from pIJ2925-hyg plasmid and cloned in BamHI site of pJZ13 between <i>upstream</i> and <i>downstream</i> flanking arms | this work                                                               |
| pJZ15              | pJZ12 in which <i>upstream</i> flanking arm was replaced by <i>upstream2</i> flanking arm amplified using the primer pair D4 and D5 and cloned into BamHI and PstI sites                                                     | this work                                                               |
| pGR1               | <i>SCO6294</i> gene amplified with G1 and G2 primers cloned in pGEM-T Easy vector                                                                                                                                            | this work                                                               |
| pJZE1              | expression plasmid pET28a(+) with <i>hypR</i> ( <i>SCO6294</i> ) gene cloned in NdeI and HindIII sites to generate His-tagged HypR protein                                                                                   | this work                                                               |
| pMS08              | expression plasmid pET28NStrep with <i>hypR</i> ( <i>SCO6294</i> ) gene cloned in BamHI and HindIII sites to generate Strep-tagged HypR protein                                                                              | this work                                                               |
| pIJ12738           | vector for conjugal transfer from <i>E. coli</i> to <i>Streptomyces</i> , non-integrative, (Apra <sup>R</sup> ), does not propagate in <i>Streptomyces</i> , containing the I-SceI recognition sequence                      | (Fernandez-Martinez and Bibb, 2014)                                     |
| pIJ12742           | temperature sensitive I-SceI meganuclease delivery vector, (Apra <sup>R</sup> , Thi <sup>R</sup> )                                                                                                                           | (Fernandez-Martinez and Bibb, 2014)                                     |
| pMK43              | pIJ12738 with right flanking arm amplified using the primer pair D11 and D12 and cloned in KpnI and NotI sites                                                                                                               | this work                                                               |
| pMK44              | pMK43 with left flanking arm amplified using the primer pair D9 and D10 and cloned in HindIII and NotI sites                                                                                                                 | this work                                                               |
| pFLUXH             | $\Phi$ BT1 integrating reporter plasmid with a promoterless luciferase operon <i>luxCDAEB</i>                                                                                                                                | (Craney et al., 2007) modified by Szafran et al. (Szafran et al., 2016) |
| pFLUXH derivatives | pFLUXH with promoter fragments for luciferase assay listed in table S1 in the supplementary material                                                                                                                         | this work                                                               |

- Bierman, M., Logan, R., O'Brien, K., Seno, E. T., Nagaraja Rao, R., and Schoner, B. E. (1992). Plasmid cloning vectors for the conjugal transfer of DNA from *Escherichia coli* to *Streptomyces* spp. *Gene* 116, 43–49. doi:10.1016/0378-1119(92)90627-2.
- Blondelet-Rouault, M. H., Weiser, J., Lebrihi, A., Branny, P., and Pernodet, J. L. (1997). Antibiotic resistance gene cassettes derived from the  $\Omega$  interposon for use in *E. coli* and *Streptomyces*. *Gene* 190, 315–317. doi:10.1016/S0378-1119(97)00014-0.
- Craney, A., Hohenauer, T., Xu, Y., Navani, N. K., Li, Y., and Nodwell, J. (2007). A synthetic luxCDABE gene cluster optimized for expression in high-GC bacteria. *Nucleic Acids Res.* 35, 1–10. doi:10.1093/nar/gkm086.
- Fernández-Martínez, L. T., Bibb, M. J. (2014) Use of the meganuclease I-SceI of *Saccharomyces cerevisiae* to select for gene deletions in actinomycetes. *Sci Rep.* 4, 7100. doi:10.1038/srep07100.
- Jaworski, P., Donczew, R., Mielke, T., Weigel, C., Stingl, K., and Zawilak-Pawlik, A. (2018). Structure and Function of the *Campylobacter jejuni* Chromosome Replication Origin. *Front. Microbiol.* 9, 1–18. doi:10.3389/fmicb.2018.01533.
- Kieser, T., Bibb, M. J., Buttner, M. J., Chater, K. F., and Hopwood, D. A. (2000). Practical *Streptomyces* Genetics. *John Innes Cent. Ltd.*, 529. doi:10.4016/28481.01.
- Meng, X., Brodsky, M. H., and Wolfe, S. A. (2005). A bacterial one-hybrid system for determining the DNA-binding specificity of transcription factors. *Nat. Biotechnol.* 23, 988–994. doi:10.1038/nbt1120.
- Meng, X., Smith, R. M., Giesecke, A. V., Joung, J. K., and Wolfe, S. A. (2006). Counter-selectable marker for bacterial-based interaction trap systems. *Biotechniques* 40, 179–184. doi:10.2144/000112049.
- Szafran, M. J., Gongerowska, M., Gutkowski, P., Zakrzewska-Czerwińska, J., and Jakimowicz, D. (2016). The coordinated positive regulation of topoisomerase genes maintains topological homeostasis in *Streptomyces*

coelicolor. *J. Bacteriol.* 198, 3016–3028. doi:10.1128/JB.00530-16.

Wolański, M., Donczew, R., Kois-Ostrowska, A., Masiewicz, P., Jakimowicz, D., and Zakrzewska-Czerwińska, J. (2011). The level of AdpA directly affects expression of developmental genes in *Streptomyces coelicolor*. *J. Bacteriol.* 193, 6358–6365. doi:10.1128/JB.05734-11.

### TEXT S1 Verification of *hypR* (SCO6294) gene annotation.

Alignments of HypR (SCO6294) sequence deposited in NCBI Protein Database (NP\_630392.1) with 100 highest scoring Blast hits showed that significant similarity started from Met39 which corresponded to the N-terminal methionines of other proteins. N-terminal sequence of 38 amino acids showed similarity only to a corresponding protein (EFD65697.1) from *Streptomyces lividans* TK24, a very close relative of *S. coelicolor* A3(2). However, in another sequencing project the same protein from *S. lividans* TK24 is annotated without the initial 38 amino acids (AIJ12350.1). It is an indication, that the SCO6294 gene annotation may be incorrect, and that the ATG codon corresponding to Met39 may be the real translational start. There is a potential ribosome binding site upstream of the corrected start codon. Moreover, it is consistent with the location of transcription start site of SCO6294 gene detected by Jeong et al. (Nat Commun 7:11605, 2016, doi: 10.1038/ncomms11605) (see Fig. S1 A). In order to confirm this hypothesis, two fragments covering potential promoter of *hypR* gene, p6294-old and p6294-probe (**Fig. S1 A**), were cloned into pFLUXH plasmid upstream of reporter genes. The plasmid carries a promoterless luciferase operon *luxCDAEB* encoding luciferase and enzymes necessary for luciferase substrate (tetradecanal) biosynthesis (Craney *et al*, Nucleic Acids Res 35(6):e46, 2007). It allows direct monitoring of the luminescence in bacterial biomass. Each of the two promoter probe plasmids was introduced into *S. coelicolor* M145 strain by conjugation. High luciferase activity was observed only for fragment p6294-probe. No luminescence was detected for p6294-old fragment (**Fig. S1 B**). This leads us to the conclusion that the active promoter is located immediately upstream of the corrected start codon and that HypR protein consists of 225 amino acids (without the 38 N-terminal amino acids present in the NP\_630392.1 sequence).

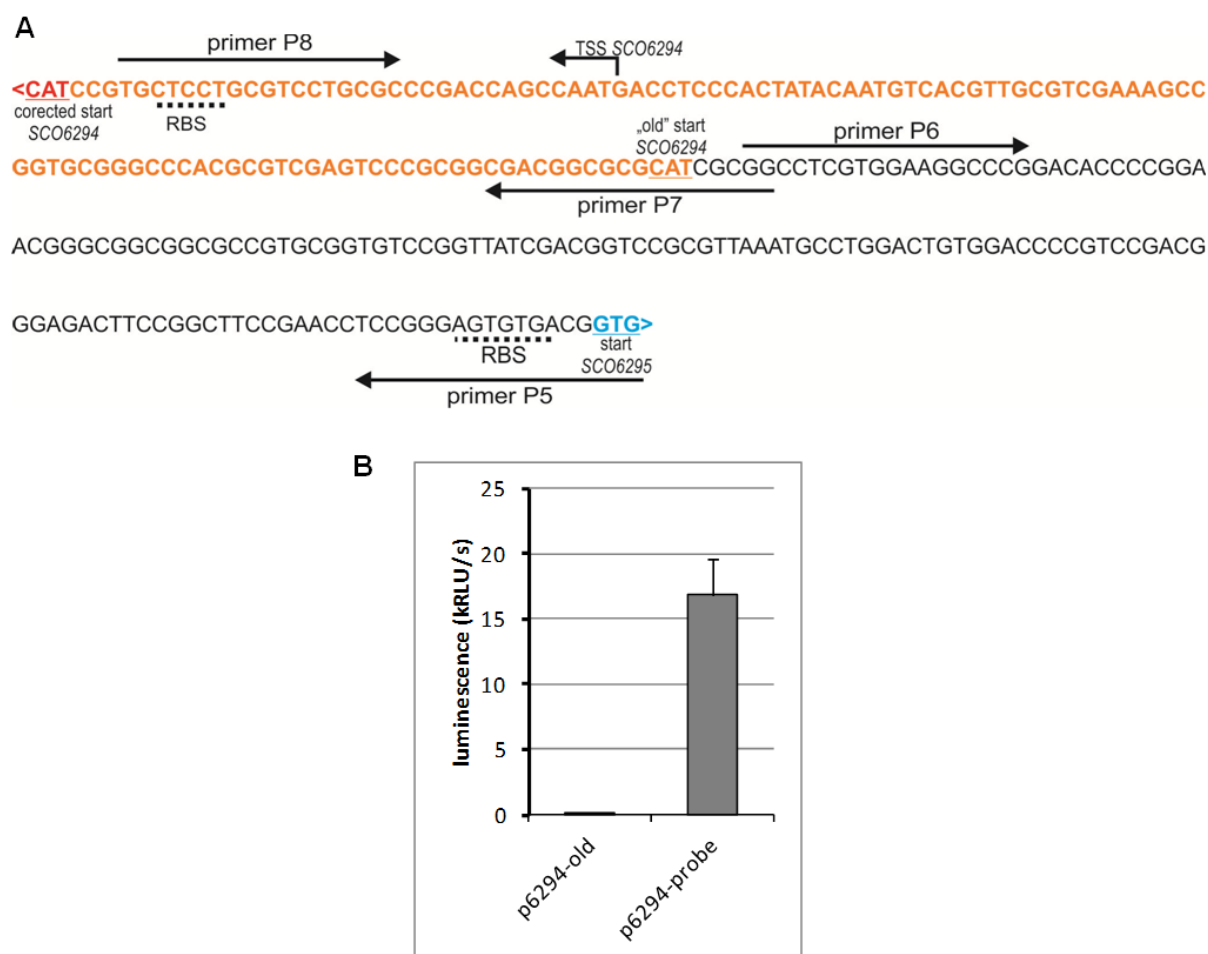

**FIGURE S1** Verification of *hypR* (*SCO6294*) annotation. **(A)** DNA sequence of the fragment between *hypR* and *SCO6295* genes (respective start codons are marked with red and blue). Orange – fragment misannotated in EMBL/GenBank (Accession No. AL645882) as coding 38 N-terminal amino acids of *SCO6294* (protein ID NP\_630392.1). Start codons are underlined with solid lines and predicted ribosome binding sites (RBS) are underlined with dotted lines. TSS – transcription start site of *SCO6294* (Jeong *et al*, Nat Commun 7:11605, 2016, doi: 10.1038/ncomms11605). Location of primers is shown with arrows above the text (if the primer 5'→3' sequence is in the same orientation) and below the text (in case of opposite orientation). Primer pairs P5, P6 and P7, P8 (see **Table S1**) were used to amplify DNA fragments p6294-old and p6294-probe located above the “old” (misannotated) and corrected start sites, respectively. **(B)** Comparison of luminescence intensity after 45 h of growth of *S. coelicolor* M145 strains carrying integrated promoter probe plasmids (pFLUXH derivatives) with either p6294-old or p6294 fragment. Average values of data from three experiments are shown. Error bars represent standard deviation.

| Name   | Sequence              |
|--------|-----------------------|
| KNRA68 | T TATGCTATCAT TCCTAC  |
| KNRA61 | T TATGCTATCAT TCCTAC  |
| KNRA25 | T TATGCTATCAT TCCTAC  |
| KNRA81 | AGCTCTC TATGATACCGC   |
| KNRA64 | TTTAACT TAGGATACCAC   |
| KNRA48 | AGCTCTC TATGATACCGC   |
| KNRA77 | TGC TATGATACAAAT TAGT |
| KNRA73 | G TATGCTACACT GCGACT  |
| KNRA71 | G TATGCTACACT GCGACT  |
| KNRA76 | G TATCCTGTCAT AATGCG  |
| KNRA56 | G TATCCTGTCAT AATGCG  |
| KNRA79 | TCTGGTACCGC AAATGAA   |
| KNRA78 | AGTGCA TAAGCTTACAC G  |
| KNRA59 | AGTGCA TAAGCTTACAC G  |
| KNRA80 | TCTGATTACCT TTGAGTC   |
| KNRA66 | TCTGATTACCT TTGAGTC   |
| KNRA58 | GC TAACATACTAT AGCGA  |
| KNRA54 | GC TAACATACTAT AGCGA  |
| KNRA69 | AATAT TAGTAAAACCC CC  |
| KNRA62 | GGGAT TCTTCAGCCCC TG  |
| KNRA55 | GGGAT TCTTCAGCCCC TG  |
| KNRA63 | TCCC TAATCTCAAAAT AAA |
| KNRA37 | CGTATA TATGGAGCGAT C  |
| KNRA75 | CCG GAGCCTCACCT GCCT  |
| KNRA74 | CCG GAGCCTCACCT GCCT  |
| KNRA72 | CCCTACC GATTGTAATAC   |
| KNRA21 | CGTGTGT TCGTGTTACAC   |
| KNRA45 | GTGC TATTATGTTGC CGG  |
| KNRA57 | TAGTGTGCGAT TAAGGGC   |
| KNRA53 | ACATGGG TATTATATCGA   |
| KNRA65 | TGA TATAATCAACC AGCG  |
| KNRA60 | TGGACCC CATGGTAGCAT   |
| KNRA52 | AATCGTC GCTGTAAACAT   |
| KNRA70 | TT TATGTCCCAC TCCTT   |
| KNRA67 | TCTTTT AATGAACATAC C  |

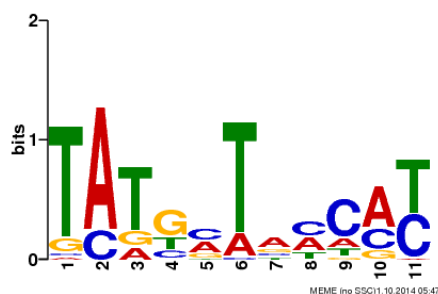

**FIGURE S2** Sequences from 35 clones identified in bacterial one hybrid system as those in which interaction between the HypR protein and the promoter region of reporter genes took place and the consensus sequence logo (E-value: 1.5e-10) derived from them by the MEME algorithm.

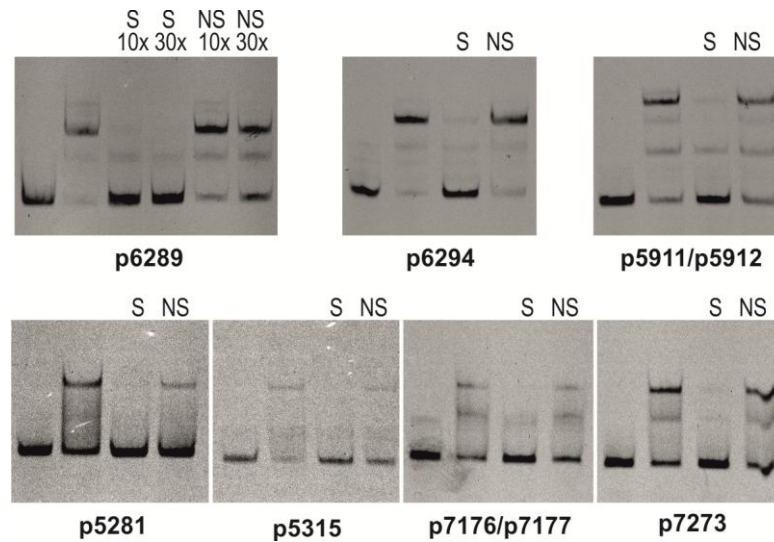

**FIGURE S3** Binding of HypR protein to IR Dye 800 labeled promoter fragments indicated below each panel. First lane in each panel contains no protein. HypR concentration in the remaining lanes was 19 nM. S – specific competitor (unlabeled probe), NS – non-specific competitor (unlabeled promoter of *SCO6281* gene amplified with P12 and P13 primer pair). Competitor DNA was added in 10-fold excess (molar ratio) over labeled fragment, unless indicated differently.

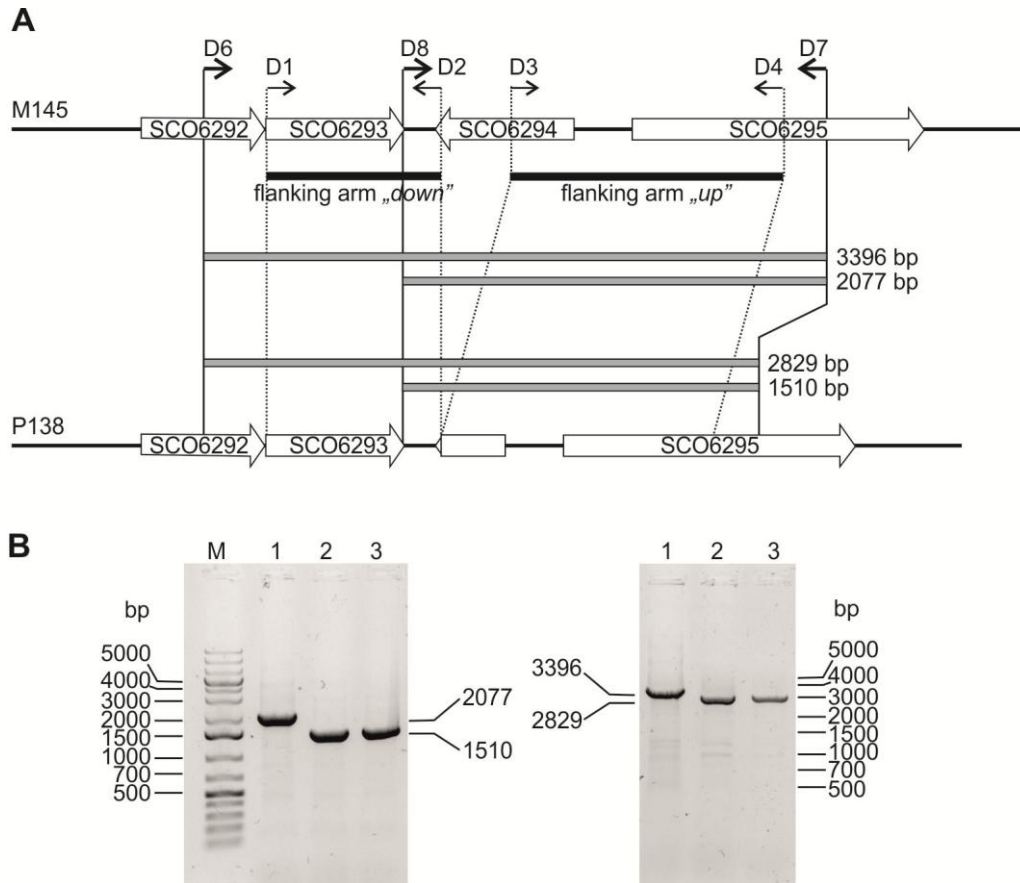

**FIGURE S4** Deletion of *hypR* (*SCO6294*) gene and verification by PCR. **(A)** Location of primers and PCR products used as flanking arms for homologous recombination (black bars) and to verify deletion (grey bars), M145 – wild type, P138 – deletion mutant. **(B)** PCR products with primer pairs D8 and D7 (left panel) or D6 and D7 (right panel); 1 - M145, 2, 3 - P138 (two exconjugants), M - 1kb Plus DNA Ladder (Thermo Scientific)

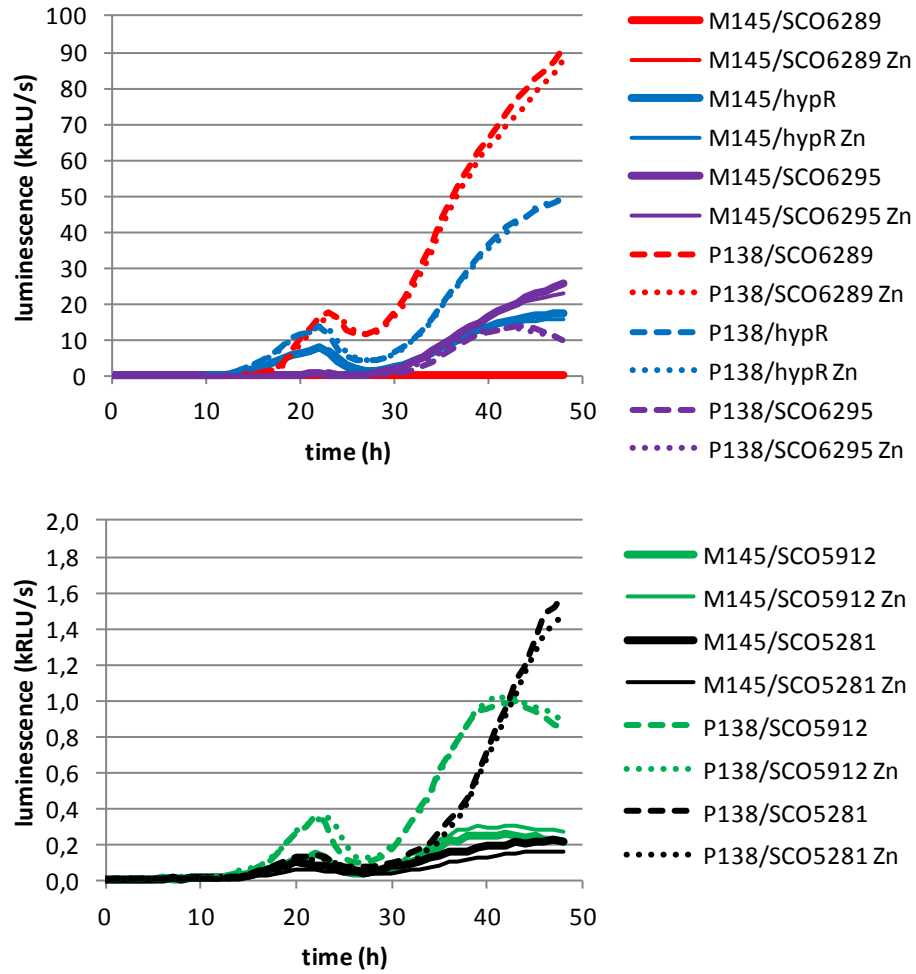

**FIGURE S5** Activity of promoters measured as luminescence intensity in wild type (M145) and *hypR* deletion mutant (P138) strains carrying integrated promoter probe plasmids (pFLUXH derivatives) grown on solid modified 79 medium in the absence and presence of zinc ions (10  $\mu$ M  $ZnCl_2$ ). Measurements were taken in triplicate, graphs represent average values.

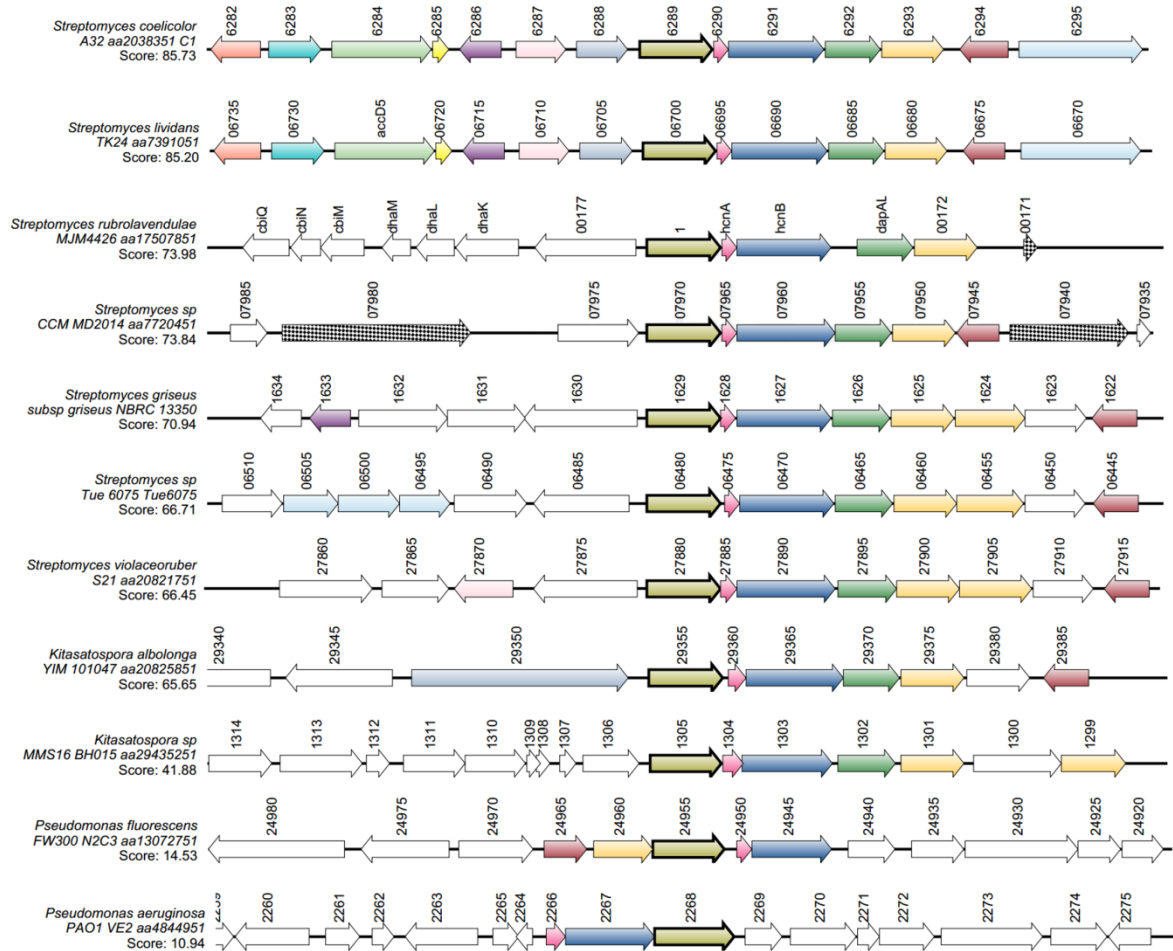

**FIGURE S6** Synteny of *SCO6289-SCO6293* genes (predicted L-hydroxyproline utilization pathway) shared with *Streptomyces*, *Kitasatospora* and *Pseudomonas* genomes. *SCO6289* amino acid sequence was used as a query for SyntTax (Oberto, BMC Bioinformatics, 14:4, 2013, doi: 10.1186/1471-2105-14-4).

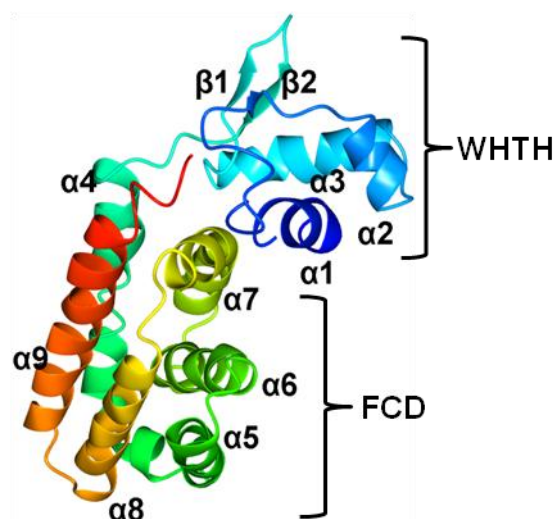

**FIGURE S7** The overall architecture of HypR protein with DNA and ligand binding domains marked as WHTH and FCD, respectively. Model based on the crystal structure of TM0439 from *Thermotoga maritima* (PDB 3FMS) as a template was obtained with Phyre2 program (Kelley and Sternberg, Nat Protoc 4:363–373, 2009, doi: 10.1038/nprot.2009.2). TM0439 is a dimer, the model represents one subunit. Visualisation was made using CC4MP program version 2.10.6. The model is colored in blend through mode from blue to red, from N- to C-terminus, respectively.

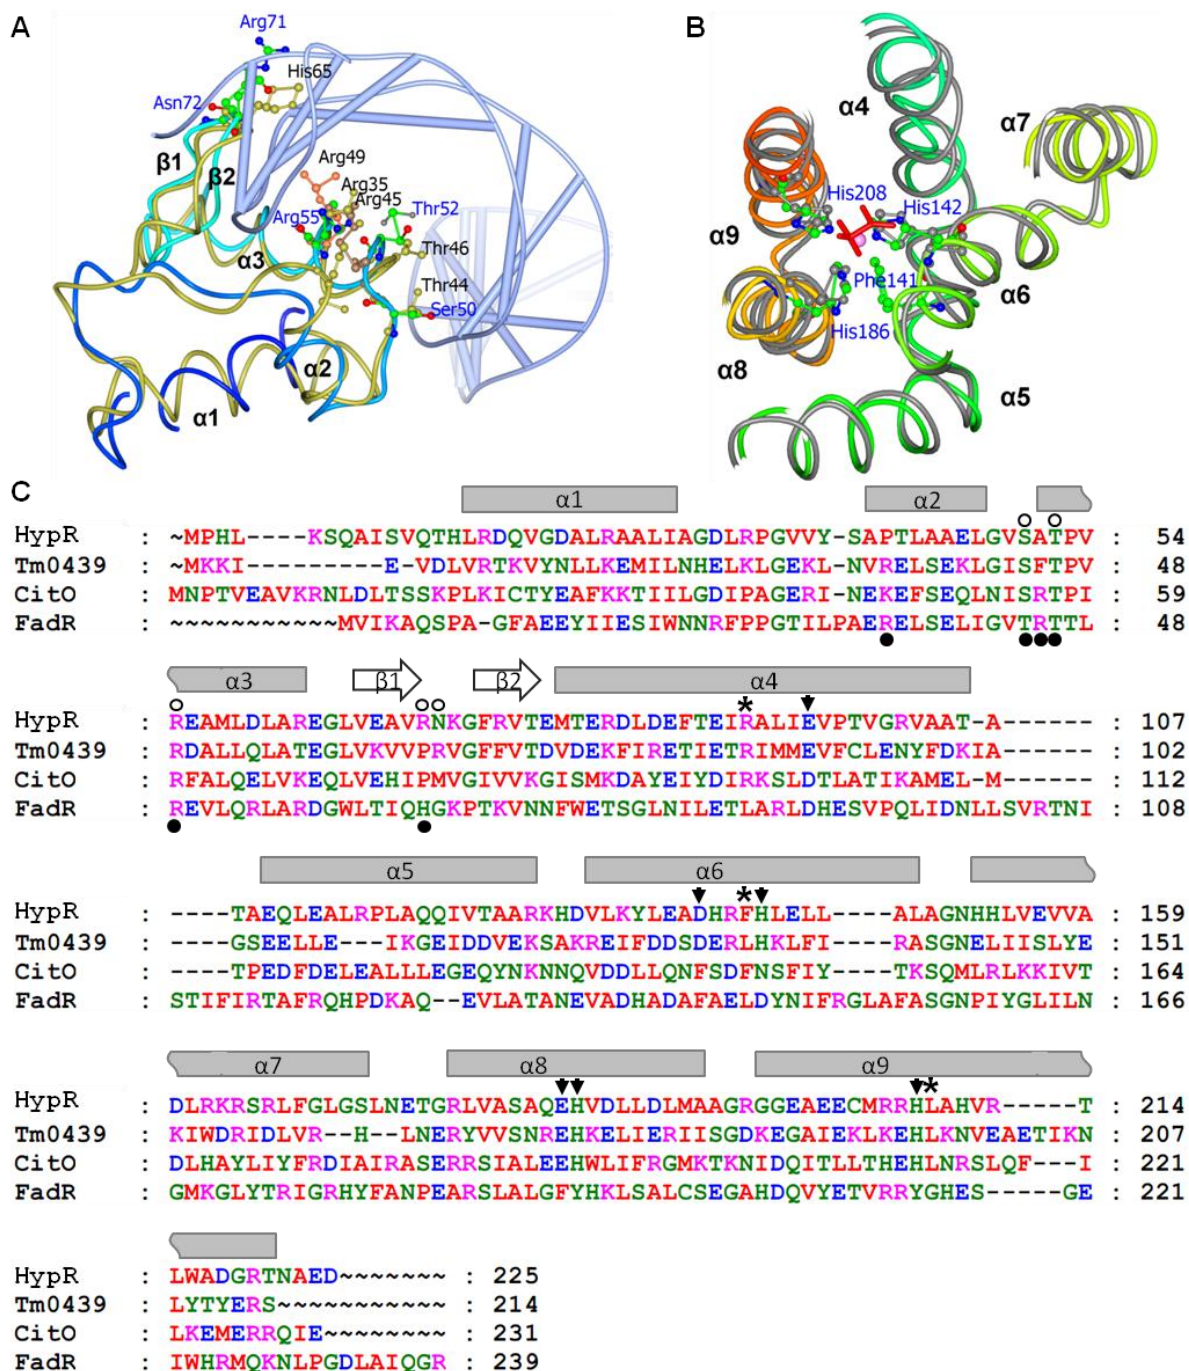

**FIGURE S8** Model of HypR based on the crystal structure of TM0439 from *Thermotoga maritima* (PDB 3FMS) as a template obtained with Phyre2 program (Kelley and Sternberg, Nat Protoc 4:363–373, 2009, doi: 10.1038/nprot.2009.2) (A, B) and alignment of HypR amino acid sequence with TM0439 and two other proteins from FadR subfamily, for which structural or functional data are available (C). Visualisation was made using CC4MP program version 2.10.6. The model is colored in blend through mode from blue to red, from N- to C-terminus, respectively. Amino acids of HypR are numbered according to the corrected start codon. (A) DNA binding domain. The DNA was modeled by superposition of the FadR-DNA complex (PDB 1hw2) onto the WHTH domain of HypR. The structure of FadR is shown in gold and amino acids involved in DNA binding are shown in single colors and labeled in black. Putative DNA binding residues of HypR are colored according to atom type and labeled in blue. (B) Superposition of HypR and TM0439 FCD domains. TM0439 is shown in

grey together with His residues coordinating Ni<sup>2+</sup> ion represented by a pink ball. Acetate molecule found in TM0439 structure is shown as red sticks. Histidines implicated in metal ion binding and Phe141 potentially involved in shaping of the ligand binding pocket in HypR are colored according to atom type and labeled in blue. (C) NCBI accession numbers: HypR – amino acids 39-263 of NP\_630392, TM0439 from *Thermotoga maritima* – AGL49361, CitO from *Enterococcus faecalis* – ADX78673, FadR from *Escherichia coli* - WP\_000234823. Predicted secondary structure elements of HypR protein are shown above the sequence. Black dots indicate amino acids of FadR interacting with DNA (Xu *et al.*, J Biol Chem 276:17373–17379, 2001). White circles and black arrowheads indicate amino acids of HypR predicted to bind DNA and metal ion, respectively. Asterisks show conserved amino acids which are important for ligand binding and correct function of FCD domain in CitO (Blancato *et al.*, Front Microbiol 7:2–5, 2016, doi: 10.3389/fmicb.2016.00101).
